# Supplementary material for: A conserved switch controls virulence, sporulation, and motility in C. difficile
Source: PubMed Central journal article supplement (PMC11115286; doi:10.1371/journal.ppat.1012224), 2024-05-13
Supplement: ppat.1012224.s011.pdf [file ppat.1012224.s011.pdf]

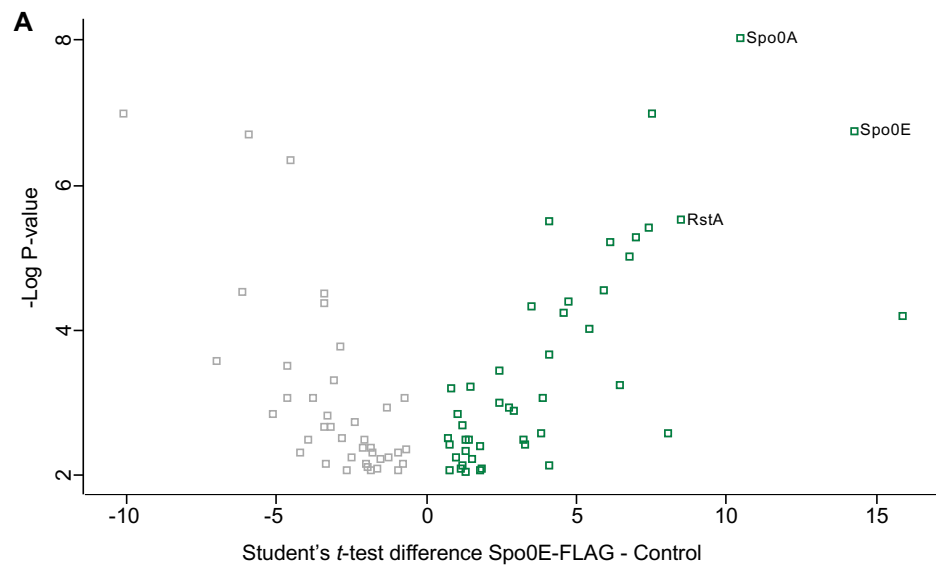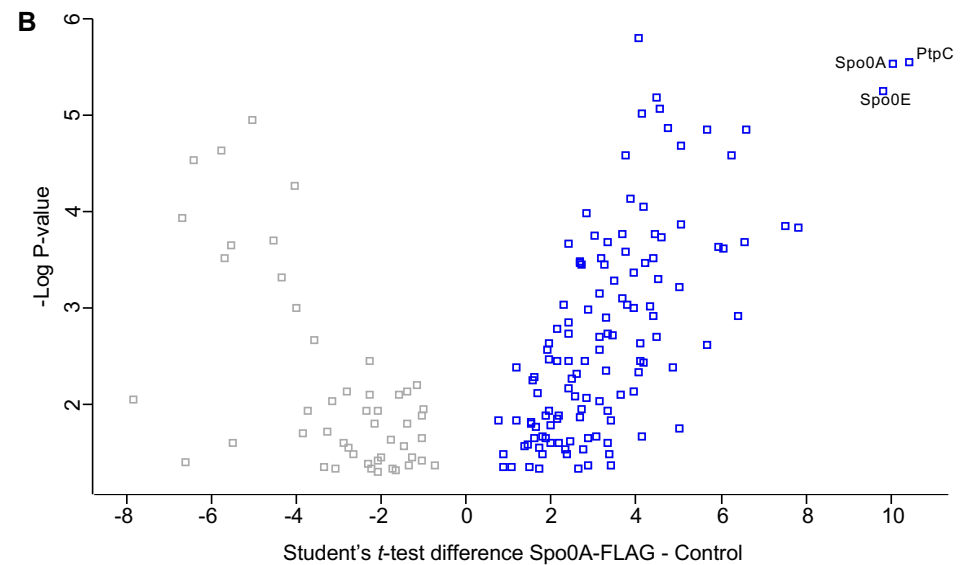

**S2\_Figure. Spo0E and Spo0A co-purify with regulators of sporulation, toxin, and motility. A)** Scatter plot of enriched proteins identified in the Spo0E pulldown comparing the mass spec profiles of Spo0E-FLAG (MC1968, green, 45 unique proteins) and vector control (MC324, gray) and **B)** Spo0A pulldown comparing mass spec profiles of Spo0A-FLAG (MC1003, blue, 124 unique proteins) and vector control (MC324, gray).  $P \leq 0.05$ . Scatter plots generated using Perseus Version 1.6.15.0.
